# Supplementary material
Source: publisher figshare collection journal article supplement (https://gsapubs.figshare.com/articles/dataset/_/12535196)
Supplement: Supplementary file 1 [file 1]

## GSA Data Repository 2017213

Rojas, et al., 2017, Global biogeography of Albian ammonoids: A network-based approach: Geology, doi:10.1130/G38944.1.

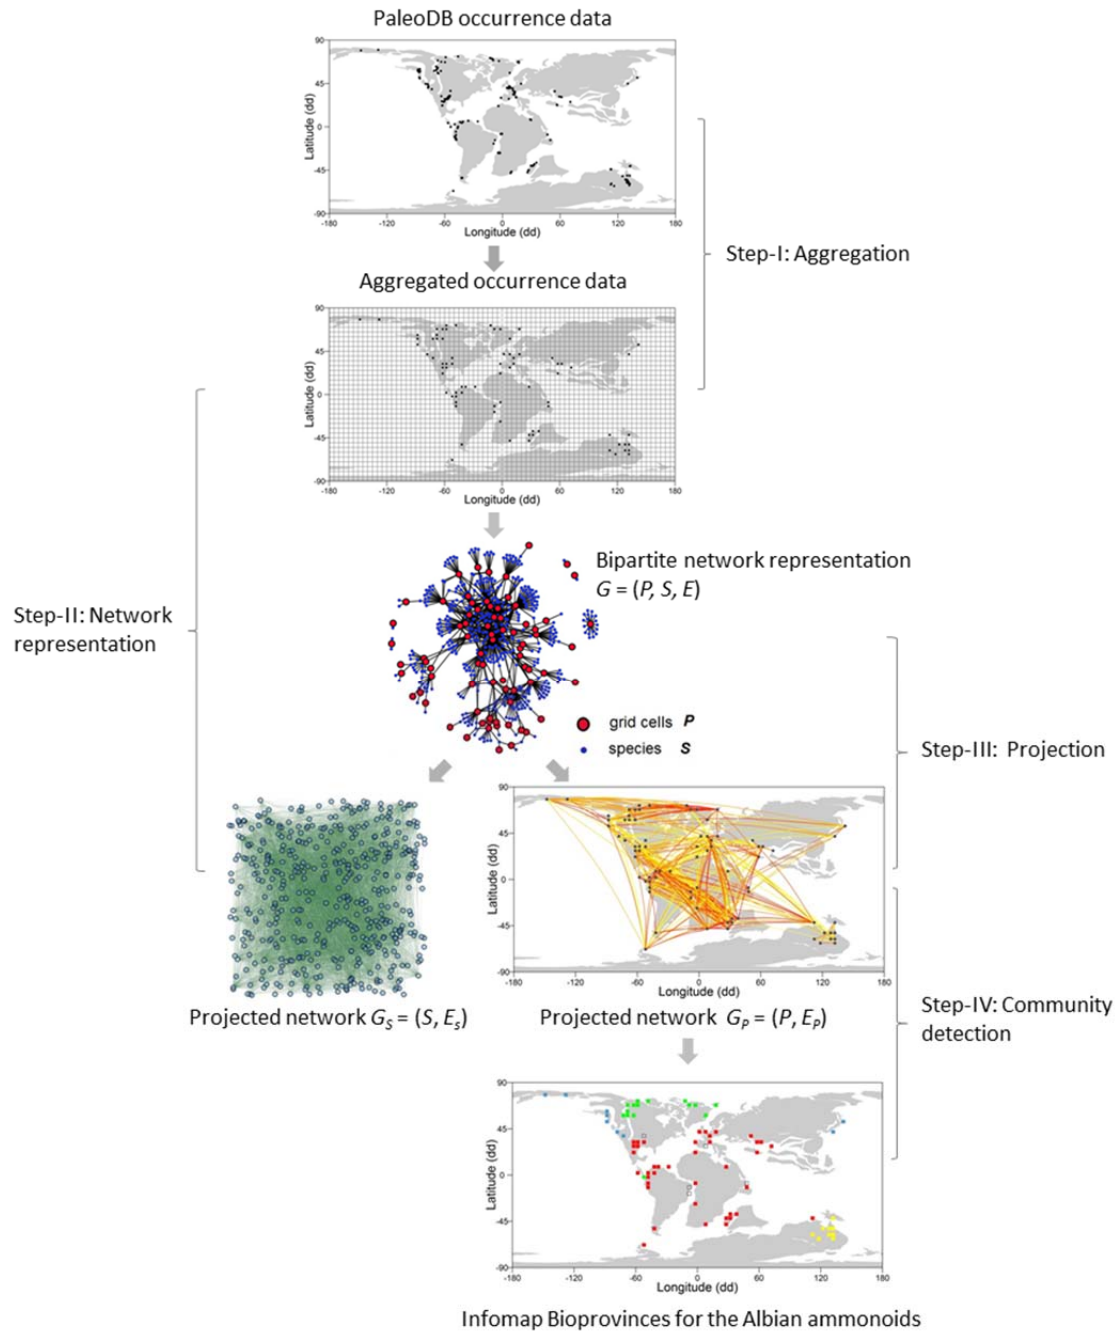

**Figure DR1.** Workflow diagram indicating the procedures implemented in the analysis of the global records of Albian ammonoids.

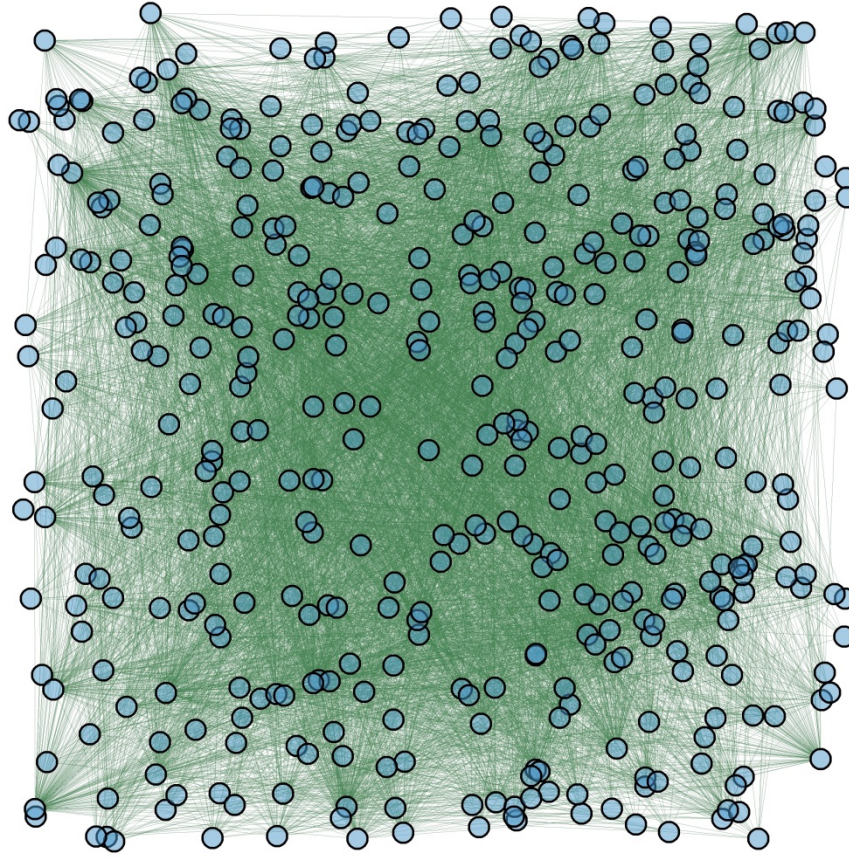

**Figure DR2.** Projected network  $G_S$ . It is a projection from the bipartite network  $G$  onto the node subset  $S$ . Dots represent species and lines represent the connections between them. Normalized centrality scores for individual species are summarized in Table DR5.

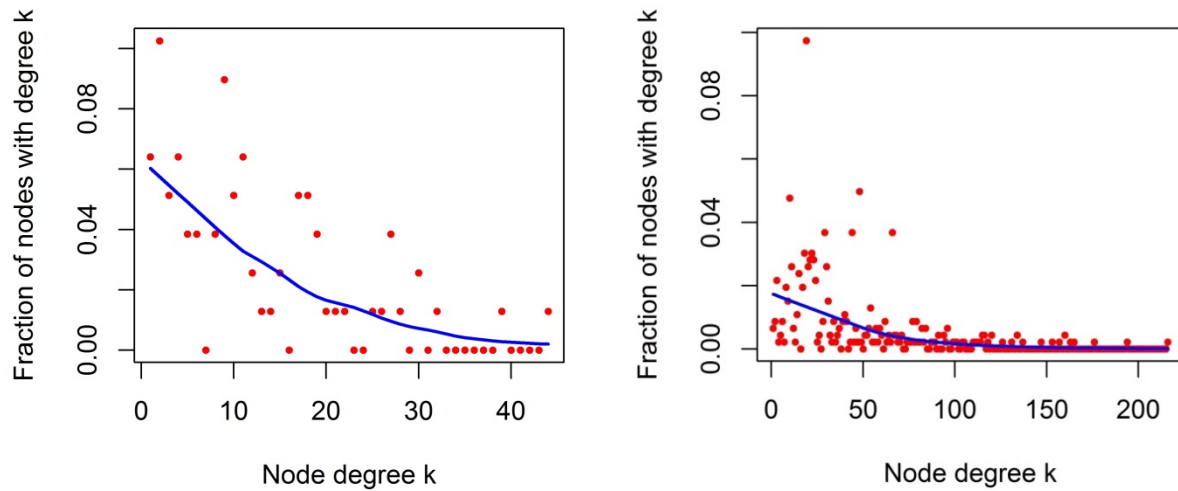

**Figure DR3.** Node degree distribution for the projected networks  $G_P$  (left) and  $G_S$  (right)

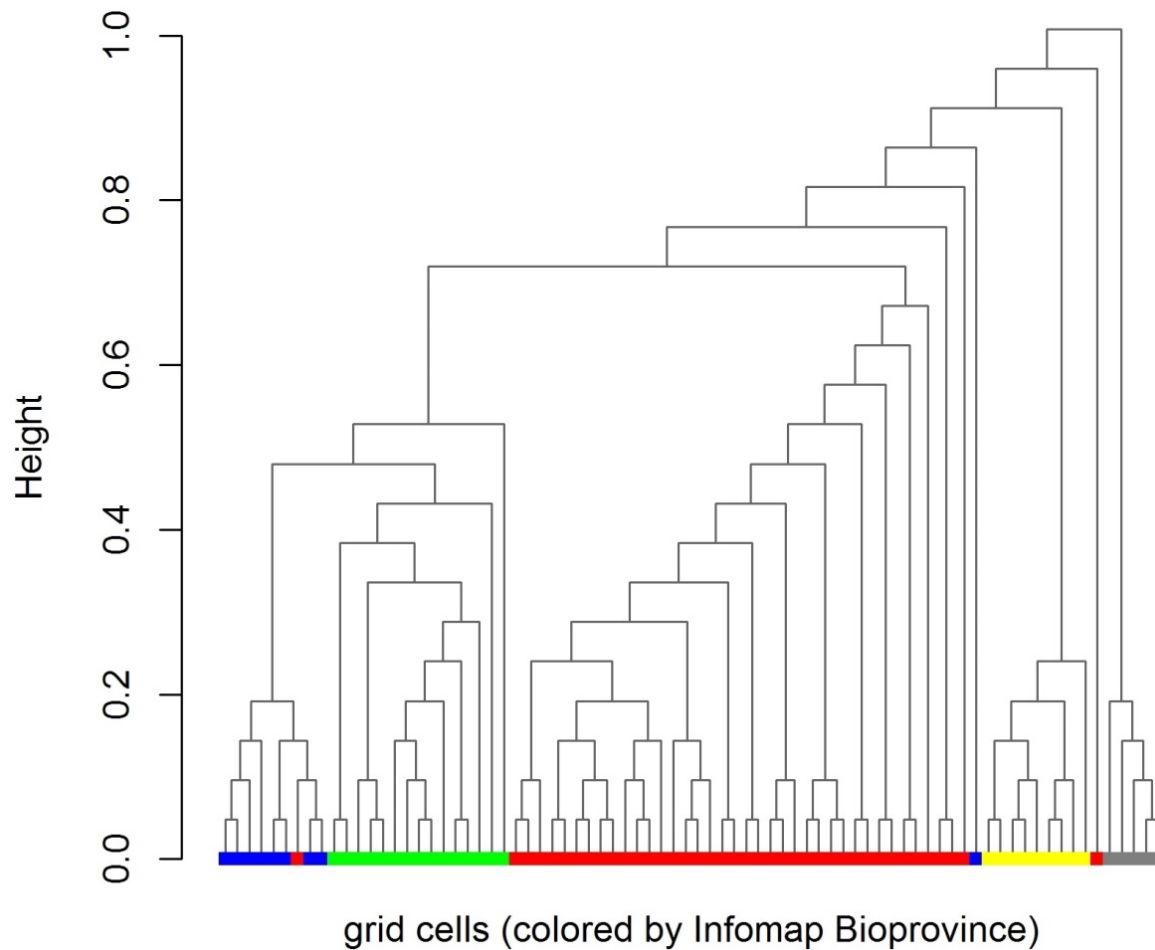

**Figure DR4.** Ammonoid occurrence data per grid cell (i.e., incidence matrix  $B$ ) clustered using the unweighted pair-group arithmetic average method (UPGMA). Distances between grid cells were calculated using Bray–Curtis dissimilarity. For easier comparison of the cluster topology with the Infomap bioprovinces, the height of the tree nodes were adjusted so that the tree will have a distance of 1 unit between each parent/child nodes. The height range was also adjusted to 1. This analysis was performed using the *vegan* package for R software (version 2.3-4, Oksanen et al., 2016).

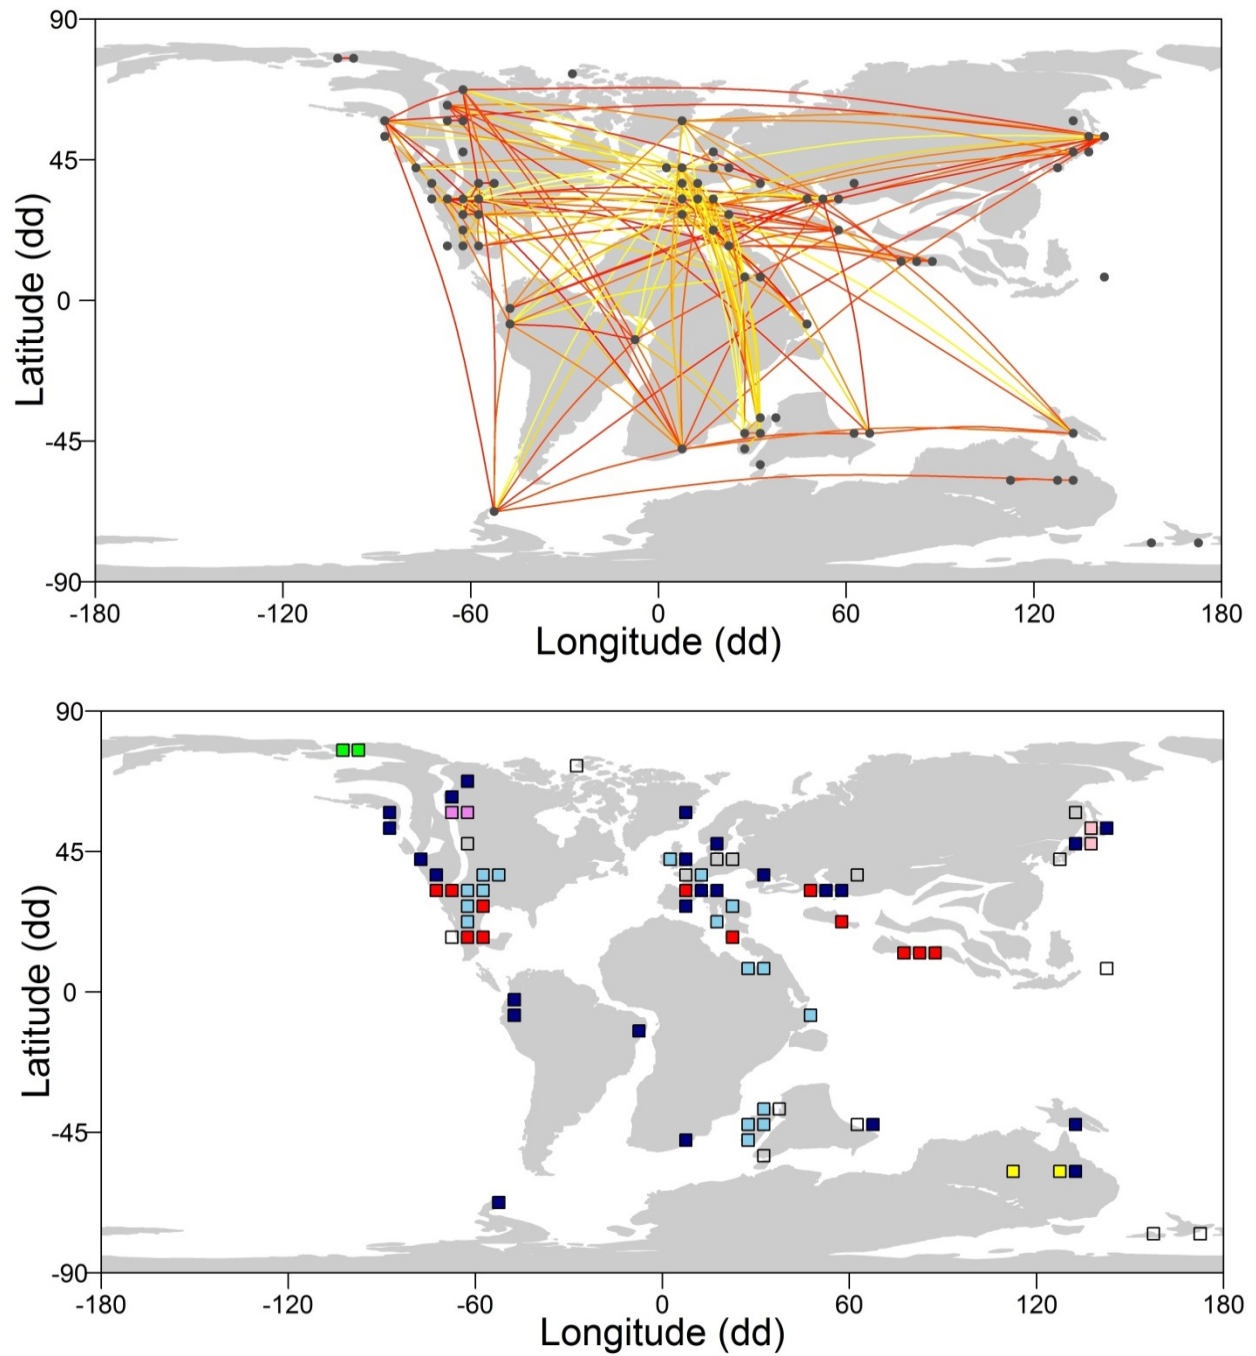

**Figure DR5.** Top: Projected network  $G_{P-benthos}$  derived from Albian benthic marine invertebrate records in the PaleoDB. Links are colored indicating their connection strength (CS). Bottom: Infomap bioprovinces. Black unfilled squares are isolated nodes.

| Infomap Bioprovince | IB1 | IB2 | IB3 | IB4 | IB5 | IB6 | IB7 |
|---------------------|-----|-----|-----|-----|-----|-----|-----|
| Anthozoa            | 1   | 36  | 91  | —   | —   | —   | —   |
| Asteroidea          | 1   | 14  | —   | —   | 100 | —   | —   |
| Bivalvia            | 24  | 26  | 1   | 100 | —   | —   | 100 |
| Calcarea            | —   | —   | —   | —   | —   | —   | —   |
| Crinoidea           | 7   | —   | —   | —   | —   | —   | —   |
| Demospongea         | —   | —   | —   | —   | —   | —   | —   |
| Echinoidea          | 9   | 2   | —   | —   | —   | —   | —   |
| Gastropoda          | —   | —   | —   | —   | —   | —   | —   |
| Hexactinellida      | —   | —   | —   | —   | —   | —   | —   |
| Holothuroidea       | —   | —   | 0   | —   | —   | —   | —   |
| Lingulata           | 1   | 6   | —   | —   | —   | —   | —   |
| Malacostraca        | 7   | 7   | 2   | —   | —   | 75  | —   |
| Ophiuroidea         | —   | 0   | 0   | —   | —   | 25  | —   |
| Rhynchonellata      | 51  | 8   | 5   | —   | —   | —   | —   |

**Figure DR6.** Taxonomic composition of the Infomap bioprovinces delineated in the projected network  $G_{P-benthos}$ .

**Table DR1.** Incidence matrix (B) representing the connections between species (S) and grid cells (P) for the Albian ammonoid data gathered from the PaleoDB

| Algorithm                | Number of communities* | Comunities size            | Q <sup>†</sup> | NMI <sup>§</sup>  |
|--------------------------|------------------------|----------------------------|----------------|-------------------|
| InfoMap (IM)             | 4                      | 40, 15, 9, 9               | 0.24           | N.A. <sup>#</sup> |
| Label Propagation (LP)   | 4                      | 40, 12, 12, 9              | 0.24           | 0.94              |
| Walktrap (WT)            | 3                      | 40, 24, 9                  | 0.26           | 0.92              |
| Multilevel (ML)          | 4                      | 25, 22, 17, 9              | 0.31           | 0.78              |
| Fastgreedy (FG)          | 4                      | 25, 23, 16, 9              | 0.30           | 0.78              |
| Leading Eigenvector (LE) | 5                      | 26, 19, 14, 9, 2           | 0.28           | 0.70              |
| Edge Betweenness (EB)    | 9                      | 23, 9, 7, 7, 5, 3, 2, 2, 2 | 0.18           | 0.65              |

\*Isolate nodes have not been taken into account since they provide no meaningful information on the overall network structure.

<sup>†</sup>Q = Modularity.

<sup>§</sup>NMI = Normalized Mutual Information score.

<sup>#</sup>N.A. = not applicable.

**Table DR2.** Comparison of the estimated community structures in the projected network derived from Albian ammonoid records in the PaleoDB ( $G_P$ ).

**Table DR3.** Incidence matrix (B) representing the connections between species (S) and grid cells (P) for the Albian marine invertebrate data gathered from the PaleoDB

| Network                                   | Ammonoids ( $G_P$ ) | Benthos ( $G_{P-benthos}$ ) |
|-------------------------------------------|---------------------|-----------------------------|
| Number of nodes                           | 78                  | 77                          |
| Number of links                           | 433                 | 176                         |
| Density                                   | 0.14                | 0.06                        |
| Modularity (Q)                            | 0.23                | 0.37                        |
| Infomap communities (size $\geq 2$ nodes) | 4                   | 7                           |
| Disconnected nodes                        | 5                   | 15                          |

**Table DR4.** Comparison of the projected networks derived from Albian ammonoid ( $G_P$ ) and benthic marine invertebrate records ( $G_{P-benthos}$ ) in the PaleoDB.



| Species                                             | DEC | EVC  | BTC  | Species                                                | DEC | EVC  | BTC  |
|-----------------------------------------------------|-----|------|------|--------------------------------------------------------|-----|------|------|
| <i>Desmoceras (Desmoceras) latidorsatum</i>         | 215 | 0.93 | 0.62 | <i>Sciponoceras baculoide</i>                          | 88  | 0.39 | 0.05 |
| <i>Phylloceras velledae</i>                         | 193 | 1.00 | 0.21 | <i>Mortonicerias (Subschloenbachia) rostratum</i>      | 87  | 0.30 | 0.21 |
| <i>Hysterocheras orbignyi</i>                       | 175 | 0.93 | 0.17 | <i>Douvilleicerias monile</i>                          | 86  | 0.22 | 0.21 |
| <i>Hysterocheras subbinum</i>                       | 164 | 0.65 | 0.17 | <i>Mortonicerias (Mortonicerias) inflatum</i>          | 83  | 0.32 | 0.08 |
| <i>Anagaudrycerias sacya</i>                        | 162 | 0.41 | 0.83 | <i>Eogaudrycerias (Eogaudrycerias) shimizui</i>        | 83  | 0.34 | 0.04 |
| <i>Douvilleicerias mammillatum</i>                  | 159 | 0.50 | 0.72 | <i>Mariella (Mariella) miliaris</i>                    | 83  | 0.34 | 0.04 |
| <i>Anisoceras perarmatum</i>                        | 159 | 0.77 | 0.26 | <i>Mortonicerias (Mortonicerias) pricei</i>            | 82  | 0.34 | 0.11 |
| <i>Anisoceras armatum</i>                           | 156 | 0.79 | 0.18 | <i>Dipoloceras (Rhytidoceras) elegans</i>              | 81  | 0.26 | 0.18 |
| <i>Dipoloceras (Dipoloceras) cristatum</i>          | 152 | 0.70 | 0.35 | <i>Mortonicerias (Deiradoceras) devonense</i>          | 81  | 0.35 | 0.04 |
| <i>Beudanticeras beudanti</i>                       | 146 | 0.61 | 0.52 | <i>Neophlycticeras (Neophlycticeras) blancheti</i>     | 81  | 0.44 | 0.03 |
| <i>Lechites (Lechites) gaudini</i>                  | 136 | 0.76 | 0.15 | <i>Stoliczkaia (Stoliczkaia) clavigera</i>             | 80  | 0.37 | 0.02 |
| <i>Douvilleicerias orbignyi</i>                     | 133 | 0.55 | 0.18 | <i>Idiohamites tuberculatus</i>                        | 79  | 0.30 | 0.05 |
| <i>Puzosia quenstedti</i>                           | 133 | 0.56 | 0.18 | <i>Lyelliceras lyelli</i>                              | 78  | 0.26 | 0.19 |
| <i>Phylloceras (Hypophylloceras) seresitense</i>    | 130 | 0.69 | 0.06 | <i>Kossmatella (Kossmatella) romana</i>                | 78  | 0.29 | 0.04 |
| <i>Hamites venetianus</i>                           | 125 | 0.46 | 0.15 | <i>Pervinquieria stoliczkai</i>                        | 78  | 0.32 | 0.02 |
| <i>Tetragonites rectangularis</i>                   | 119 | 0.43 | 0.39 | <i>Labeceras plasticum</i>                             | 78  | 0.35 | 0.02 |
| <i>Hysterocheras carinatum</i>                      | 119 | 0.52 | 0.06 | <i>Pseudohelicoceras robertianum</i>                   | 77  | 0.43 | 0.02 |
| <i>Hysterocheras binum</i>                          | 117 | 0.52 | 0.07 | <i>Phyllopachyceras baborense</i>                      | 76  | 0.28 | 0.03 |
| <i>Protanisoceras blancheti</i>                     | 115 | 0.44 | 0.29 | <i>Cantabrigites cantabrigense</i>                     | 76  | 0.43 | 0.00 |
| <i>Hamites virgulatus</i>                           | 115 | 0.31 | 0.15 | <i>Mortonicerias (Mortonicerias) fallax</i>            | 76  | 0.43 | 0.00 |
| <i>Tetragonites timotheanus</i>                     | 114 | 0.49 | 0.25 | <i>Neophlycticeras (Neophlycticeras) rhodanense</i>    | 76  | 0.43 | 0.00 |
| <i>Stoliczkaia (Stoliczkaia) notha</i>              | 114 | 0.69 | 0.04 | <i>Myloceras joffrei</i>                               | 75  | 0.26 | 0.04 |
| <i>Hysterocheras varicosum</i>                      | 113 | 0.55 | 0.03 | <i>Ptychoceras laeve</i>                               | 74  | 0.19 | 0.41 |
| <i>Dipoloceras (Dipoloceras) bouchardianum</i>      | 112 | 0.54 | 0.03 | <i>Anahoplites planus</i>                              | 73  | 0.28 | 0.05 |
| <i>Goodhallites goodhalli</i>                       | 111 | 0.48 | 1.00 | <i>Lechites (Lechites) moreti</i>                      | 70  | 0.26 | 0.15 |
| <i>Neophlycticeras (Neophlycticeras) brottianum</i> | 110 | 0.58 | 0.05 | <i>Neophlycticeras (Protissotia) itierianum</i>        | 70  | 0.33 | 0.03 |
| <i>Hysterocheras choffati</i>                       | 109 | 0.39 | 0.09 | <i>Mortonicerias (Mortonicerias) pachys</i>            | 69  | 0.30 | 0.09 |
| <i>Tetragonites subtimotheanus</i>                  | 104 | 0.32 | 0.31 | <i>Beudanticeras (Uhligella) rebouli</i>               | 68  | 0.25 | 0.12 |
| <i>Puzosia (Puzosia) mayoriana</i>                  | 103 | 0.57 | 0.05 | <i>Pervinquieria bassleri</i>                          | 67  | 0.20 | 0.02 |
| <i>Salazicerias (Salazicerias) salazacense</i>      | 100 | 0.37 | 0.04 | <i>Neokentrocerias costatum</i>                        | 67  | 0.23 | 0.01 |
| <i>Scaphites hugardianus</i>                        | 99  | 0.50 | 0.04 | <i>Brewericerias hulenense</i>                         | 66  | 0.04 | 0.11 |
| <i>Leymeriella (Neoleymeriella) regularis</i>       | 98  | 0.54 | 0.08 | <i>Oxytropidoceras (Venezoliceras) madagascariense</i> | 66  | 0.24 | 0.03 |
| <i>Stoliczkaia (Stoliczkaia) dispar</i>             | 95  | 0.43 | 0.06 | <i>Discohoplites subfalcatus</i>                       | 65  | 0.26 | 0.01 |
| <i>Leymeriella (Leymeriella) tardefurcata</i>       | 95  | 0.53 | 0.03 | <i>Anisoceras pseudoelegans</i>                        | 65  | 0.26 | 0.01 |
| <i>Leymeriella (Neoleymeriella) pseudoregularis</i> | 95  | 0.53 | 0.03 | <i>Cenisella bonnetiana</i>                            | 65  | 0.26 | 0.01 |
| <i>Mortonicerias (Subschloenbachia) perinflatum</i> | 94  | 0.45 | 0.08 | <i>Diadochoceras nodosocostatum</i>                    | 65  | 0.26 | 0.01 |
| <i>Mortonicerias (Mortonicerias) arietiforme</i>    | 93  | 0.28 | 0.16 | <i>Dipoloceras (Dipolocerooides) delaruei</i>          | 65  | 0.26 | 0.01 |
| <i>Ostlingoceras (Ostlingoceras) puzosianum</i>     | 93  | 0.50 | 0.02 | <i>Dipoloceras (Dipolocerooides) subdelaruei</i>       | 65  | 0.26 | 0.01 |
| <i>Mariella (Mariella) bergeri</i>                  | 90  | 0.47 | 0.03 | <i>Discohoplites simplex</i>                           | 65  | 0.26 | 0.01 |
| <i>Hamites subvirgulatus</i>                        | 90  | 0.53 | 0.01 | <i>Gaudrycerias (Gaudrycerias) cassisianum</i>         | 65  | 0.26 | 0.01 |

**Table DR5.** Centrality scores for the nodes in the projected network  $G_S$  (Fig. DR2). Degree Centrality (DEC) ranks higher a node that has a high number of connections to other nodes. This metric identifies highly connected species (i.e., important nodes in the network) and is related to the extent of their geographic distribution as well as the number of different taxa recorded per grid cell; Betweenness Centrality (BTC) ranks higher a node that connects along shortest paths with many other nodes. This metric is used to classified species as peripheral, intermediate or central in the network (Ma, et. al., 2016); Eigenvector Centrality (EVC) ranks higher a node if it connects to highly connected nodes. Those nodes not necessarily have a high number of connections but are connected to important nodes in the network. Note that only ranked higher nodes are included in the table.

## REFERENCES CITED IN THE APPENDIX

- Ma, B., Wang, H., Dsouza, M., Lou, J., He, Y., Dai, Z., Brookes, P.C., Xu, J., and Gilbert, J.A., 2016, Geographic patterns of co-occurrence network topological features for soil microbiota at continental scale in eastern China: *The ISME Journal*, v. 10, no. 8, p. 1891–1901, doi: 10.1038/ismej.2015.261.
- Oksanen, J., Blanchet, F. G., Kindt, R., Legendre, P., Michin, P. R., O'Hara, R. B., Simpson, G. L., Solymos, P., Stevens, M. H. H., and Wagner, H., 2016, *vegan: Community Ecology Package*.
- R Core Team, 2016, *R: A Language and Environment for Statistical Computing*: Vienna, R Foundation for Statistical Computing.
